# Supplementary material
Source: PubMed Central journal article supplement (PMC2532836)

# **Supporting Information**

## **Total Synthesis and Stereochemistry of Pinnatoxins B and C**

Fumiyoshi Matsuura, Junliang Hao, Reinhard Reents, and Yoshito Kishi\*

Department of Chemistry and Chemical Biology, Harvard University  
12 Oxford Street, Cambridge, MA 02138

## Table of Content

|                                                                        |         |
|------------------------------------------------------------------------|---------|
| Experimental                                                           | S2-S12  |
| Tables Listing Proton Chemical Shifts for Synthetic PnTXs B and C      | S13-S14 |
| $^1\text{H}$ NMR Spectra of Synthetic PnTXs B and C                    | S15-S16 |
| $^1\text{H}$ NMR Spectra Comparison of Synthetic PnTXs B and C         | S17-S18 |
| $^1\text{H}$ NMR Spectra of Synthetic PnTX C Doped with Natural Sample | S19     |
| Concentration Effects on $^1\text{H}$ NMR Spectra of Synthetic PnTX B  | S20     |

**General methods.** Unless otherwise noted, all reactions were carried out under positive argon pressure using oven-dried glassware and standard syringe, cannula and septa techniques. Tetrahydrofuran (THF), benzene, toluene and diethyl ether were distilled over Na / benzophenone ketyl under nitrogen immediately prior to use. Dichloromethane, acetonitrile, triethylamine, and diisopropylamine (DIPA) were distilled from CaH<sub>2</sub> under nitrogen prior to use. Dess-Martin periodinane was purchased from OmegaChem Inc. (Canada). Unless otherwise stated, all chemicals were used as received. Flash chromatography purifications were performed using Baker silica gel 60 (40 μm) and the solvents indicated. After chromatography, solvents were evaporated using a Büchi rotary evaporator, followed by further treatment under high vacuum, unless otherwise indicated. Analytical TLC was performed using 0.25 mm EM silica gel 60 F<sub>254</sub> plates that were analyzed by fluorescence upon 254 nm irradiation or by staining with anisaldehyde reagent (900 mL of 95% EtOH, 50 mL of conc. H<sub>2</sub>SO<sub>4</sub>, 50 mL of acetic acid and 5 mL of anisaldehyde).

NMR spectra were recorded on Varian Inova-600 (600MHz) and Inova-500 (500 MHz) spectrometers. Chemical shifts are reported in parts per million (ppm). For <sup>1</sup>H NMR spectra the residual solvent peak was used as the internal reference (7.26 ppm, CDCl<sub>3</sub>; 7.15 ppm, C<sub>6</sub>D<sub>6</sub>; 3.306 ppm, CD<sub>3</sub>OD). For <sup>1</sup>H NMR multiplicity (singlet (s), broad singlet (bs), doublet (d), triplet (t), quartet (q), multiplet (m)) and coupling constant(s) were reported whenever possible. Low resolution EI mass spectra were obtained using an AX-505H mass spectrometer (JEOL USA, Inc., Peabody, MA).

The stereochemical correlation between **3a/b** and **4** was carried out as shown in Scheme 1. Note that **4** is a known compound in the original PnTX A synthesis (McCauley, J. A.; Nagasawa, K.; Lander, P. A.; Mischke, S. G.; Semones, M. A.; Kishi, Y. *J. Am. Chem. Soc.* **1998**, *120*, 7647).

### Experimental for Scheme 1.

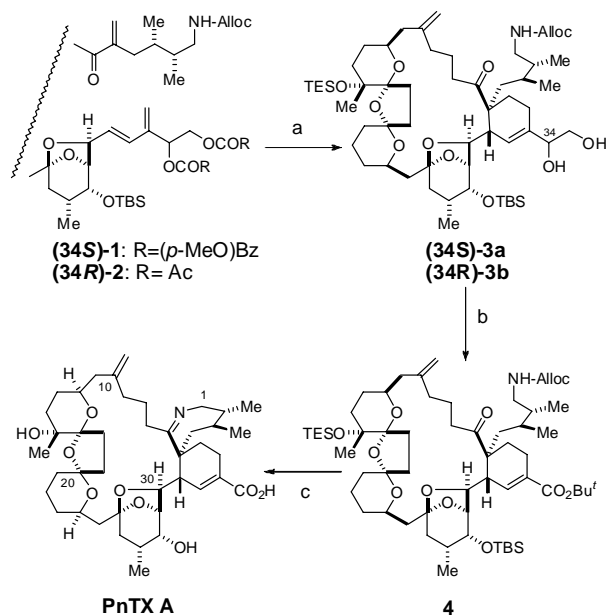

**Scheme 1. Reagents.** (a) See Ref 5. (b) 1. NaIO<sub>4</sub>. 2. NaClO<sub>2</sub>, NaH<sub>2</sub>PO<sub>4</sub>. 3. *t*-BuOH, EDC, DMAP. (c) See Ref 3.

**Ester 4.** To a solution of diol **3a** (3.0 mg) in 10% aq. THF (0.3 mL) at 0 °C was added NaIO<sub>4</sub> (10 mg). After 30 min of stirring at 0 °C, the mixture was diluted with EtOAc, washed with sat. aq. NaHCO<sub>3</sub>/Na<sub>2</sub>S<sub>2</sub>O<sub>3</sub> solution, water and brine. The organic layer was dried over anhydrous Na<sub>2</sub>SO<sub>4</sub>, filtered, and concentrated. The residue was filtered through a pad of silica gel (hexanes / EtOAc = 4:1) to give the corresponding crude aldehyde.

To a solution of the above aldehyde in *t*-BuOH (0.5 mL) was added 2-methyl-2-butene (0.3 mL), a solution of NaH<sub>2</sub>PO<sub>4</sub> (excess) and NaClO<sub>2</sub> (excess) in H<sub>2</sub>O (0.6 mL) at 0 °C. After 30 min of stirring at 0 °C, the mixture was directly applied to silica gel column (EtOAc) to afford the corresponding crude carboxylic acid.

To a mixture of the above crude acid, *t*BuOH (0.1 mL) and DMAP (0.1 mg) in CH<sub>2</sub>Cl<sub>2</sub> (0.3 mL) was added EDCI (excess). After stirring overnight at rt, the mixture was diluted with EtOAc, washed with sat. aq. NaHCO<sub>3</sub> and brine. The organic layer was dried over anhydrous Na<sub>2</sub>SO<sub>4</sub>, filtered, and concentrated. The residue was purified by SiO<sub>2</sub> flash chromatography (hexanes / EtOAc = 4:1) to afford *t*-butyl ester **4**. Comparison of the <sup>1</sup>H NMR spectrum of **4** with that of the authentic sample (McCauley, J. A.; Nagasawa, K.; Lander, P. A.; Mischke, S. G.; Semones, M. A.; Kishi, Y. *J. Am. Chem. Soc.* **1998**, *120*, 7647) established that **3a** has the desired stereochemistry.

The stereochemistry of **3b** was established employing the same procedure.

### Experimental for Scheme 2.

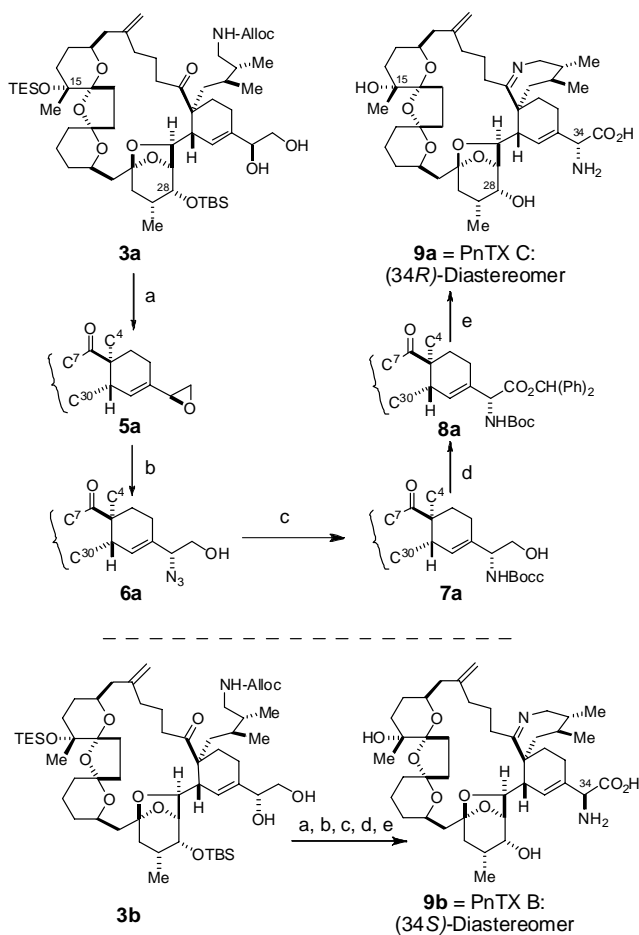

**Scheme 2. Reagents.** (a) 1. TsCl, DMAP, NEt<sub>3</sub>, 83%. 2. K<sub>2</sub>CO<sub>3</sub>, MeOH, 96%. (b)

NaN<sub>3</sub>, 96%. (c) PPh<sub>3</sub>, then Boc<sub>2</sub>O, 90%. (d) 1. Dess-Martin oxidation. 2. NaClO<sub>2</sub>, NaH<sub>2</sub>PO<sub>4</sub>. 3. Ph<sub>2</sub>C=N<sub>2</sub>, 100% over 3 steps. (e). 1. HF·py, py. 2. Pd(PPh<sub>3</sub>)<sub>4</sub>, AcOH. 3. 2,4,6-(*i*-Pr)<sub>3</sub>C<sub>6</sub>H<sub>2</sub>CO<sub>2</sub>H-Et<sub>3</sub>N, xylene, 80 °C. 4. TFA, CH<sub>2</sub>Cl<sub>2</sub>, 64% over 4 steps.

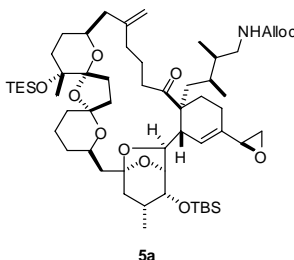

**Epoxide 3a.** To a stirred solution of diol **3a** (4.2 mg, 4.0 μmol) in CH<sub>2</sub>Cl<sub>2</sub> (0.25 mL) and Et<sub>3</sub>N (0.3 mL) was added DMAP (0.14 mg, 1.1 μmol) and TsCl (1.4 mg, 7.1 μmol). After stirring at rt for 1.5 h, the mixture was added additional amount of TsCl (0.5 mg, 2.6 μmol) and stirred at rt for another 15 min. The mixture was filtered through a pad of SiO<sub>2</sub> and concentrated in vacuo. The residue was purified by SiO<sub>2</sub> column chromatography (hexanes /EtOAc = 5:1, 3:1, 1:1, 1:2, then 1:10) to afford the corresponding tosylate and recovered diol **3a**. This procedure was repeated twice using the recovered diol to afford more corresponding tosylate (4.0 mg, 83 %) and recovered diol **3a** (0.1 mg, 2.3 %). The above tosylate was dissolved in CH<sub>2</sub>Cl<sub>2</sub>/MeOH (1:1, 1.0 mL) and was added K<sub>2</sub>CO<sub>3</sub> (5.0 mg). The mixture was stirred at rt for 30 min and filtered through a pad of SiO<sub>2</sub> and concentrated. The residue was purified by SiO<sub>2</sub> column chromatography (hexanes / EtOAc = 9:1, 5:1 then 1:1) to afford epoxide **5a** (2.4 mg, 58 % in 2 steps) as a colorless oil: <sup>1</sup>H NMR (500 MHz, CDCl<sub>3</sub>): 5.87-5.96 (m, 1H), 5.37 (s, 1H), 5.30 (dd, *J* = 17.0, 1.5 Hz, 1H), 5.21 (d, *J* = 12.0, 1.5 Hz, 1H), 4.78 (s, 1H), 4.70-4.76 (m, 2H), 4.53 (d, *J* = 5.5 Hz, 2H), 4.10-4.18 (m, 2H), 3.98-4.03 (m, 1H), 3.82 (dd, *J* = 11.5, 4.0 Hz, 1H), 3.63 (broad s, 1H), 3.26 (broad, 1H), 3.03 (broad t, *J* = 5.5 Hz, 2H), 2.86 (broad t, *J* = 4.0 Hz, 2H), 2.76 (broad s, 1H), 2.51-2.59 (m, 1H), 2.25-2.36 (m, 3H), 1.22-2.19 (m, 34H), 0.94 (t, *J* = 8.0 Hz, 9H), 0.92 (s, 9H), 0.88 (d, *J* = 7.0 Hz, 3H), 0.83 (d, *J* = 7.0 Hz, 3H), 0.80 (d, *J* = 7.0 Hz, 3H), 0.56 (q, *J* = 7.5 Hz, 6H), 0.10 (s, 3H), 0.07 (s, 3H) ppm; IR (film) 2924, 1725, 1460, 1251, 1043 cm<sup>-1</sup>; LRMS (ESI) calcd for C<sub>58</sub>H<sub>97</sub>NO<sub>11</sub>Si<sub>2</sub> [M+Na]<sup>+</sup> 1062.7, found 1062.5; [α]<sub>D</sub><sup>20</sup> +23.3 (*c* 0.12, PhH).

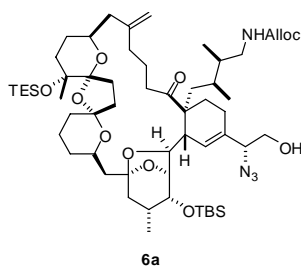

**Azide 6a.** To a stirred solution of epoxide **5a** (2.4 mg, 2.3  $\mu\text{mol}$ ) in MeOH/H<sub>2</sub>O (9:1, 1.0 mL) at rt was added NaN<sub>3</sub> (20 mg) and stirred at rt 16h. The reaction mixture was diluted with EtOAc and filtered through a pad of SiO<sub>2</sub> and concentrated in vacuo. The residue was purified by SiO<sub>2</sub> column chromatography (hexanes / EtOAc = 5:1, then 2:1) to afford azido alcohol **6a** (2.4 mg, 96%) as a colorless oil: <sup>1</sup>H NMR (500 MHz, CDCl<sub>3</sub>) 5.87-5.95 (m, 1H), 5.32 (s, 1H), 5.30 (d, *J* = 17.5 Hz, 1H), 5.21 (d, *J* = 10.5 Hz, 1H), 4.86 (broad, 1H), 4.78 (s, 1H), 4.74 (s, 1H), 4.54 (d, *J* = 5.5 Hz, 2H), 4.18 (d, *J* = 3.5 Hz, 1H), 4.09-4.17 (m, 1H), 3.95-4.05 (m, 2H), 3.82 (dd, *J* = 12.0, 4.5 Hz, 1H), 3.68-3.78 (m, 2H), 3.61 (dd, *J* = 2.5 Hz, 1H), 3.05-3.14 (m, 1H) 2.86-2.96 (m, 2H), 2.50-2.60 (m, 1H), 2.23-2.40 (m, 3H), 1.24-2.20 (m, 34H), 0.94 (t, *J* = 8.5 Hz, 9H), 0.92 (s, 9H), 0.89 (d, *J* = 7.0 Hz, 3H), 0.83 (d, *J* = 7.0 Hz, 3H), 0.77 (d, *J* = 6.5 Hz, 3H), 0.56 (q, *J* = 7.5 Hz, 6H), 0.11 (s, 3H), 0.07 (s, 3H) ppm; LRMS (ESI) calcd for C<sub>58</sub>H<sub>98</sub>N<sub>5</sub>O<sub>11</sub>Si<sub>2</sub> [M+NH<sub>4</sub>]<sup>+</sup> 1100.7, found 1100.4; [ $\alpha$ ]<sub>D</sub><sup>20</sup> -10.7 (*c* 0.14, PhH).

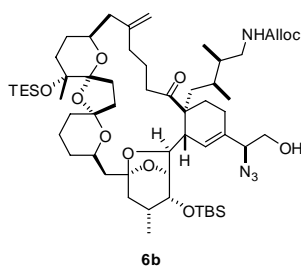

Azide **6b** was prepared according to the above procedure from diol **3b**: <sup>1</sup>H NMR (500 MHz, C<sub>6</sub>D<sub>6</sub>): 5.69-5.76 (m, 1H), 5.27 (s, 1H), 5.12 (dd, *J* = 17.0, 1.5 Hz, 1H), 4.99 (dd, *J* = 10.0, 1.5 Hz, 1H), 4.96 (s, 1H), 4.90 (s, 1H), 4.48-4.53 (m, 1H), 4.43 (d, *J* = 5.5 Hz, 1H), 4.25-4.29 (m, 2H), 4.17 (d, *J* = 3.0 Hz, 1H), 3.96 (dd, *J* = 11.5, 4.0 Hz, 1H), 3.92 (t, *J* = 7.5 Hz, 1H), 3.75 (d, *J* = 2.5 Hz, 1H), 3.64-3.67 (m, 2H), 2.98-3.00 (m, 2H), 2.75 -2.81 (m, 1H), 2.66-2.70 (m, 1H), 2.49-2.58 (m, 2H), 2.38-2.46 (m, 2H), 2.33 (dd, *J* = 12.5, 10.0 Hz, 1H), 1.20-2.24 (m, 32H), 1.03 (t, *J* = 7.5 Hz, 9H), 0.99 (s, 9H), 0.81 (d, *J*

= 6.5 Hz, 3H), 0.69 (d,  $J = 6.5$  Hz, 3H), 0.65 (d,  $J = 7.5$  Hz, 3H), 0.62 (q,  $J = 7.5$  Hz, 6H), 0.14 (s, 3H), 0.11 (s, 3H) ppm.

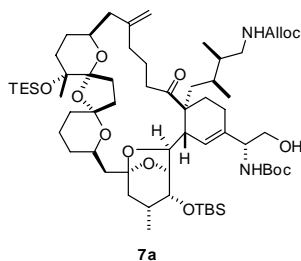

**Alcohol 7a.** To a solution of the azido alcohol **6a** (2.6 mg, 2.4  $\mu$ mol) in THF / H<sub>2</sub>O (9:1, v/v, 1 mL) was added PPh<sub>3</sub> (10.0 mg) and stirred at rt 12h. After adding Boc<sub>2</sub>O (10.0 mg), the mixture was stirred at rt for another 36 h. The mixture was concentrated in vacuo and the residue was purified by SiO<sub>2</sub> column chromatography (hexanes / EtOAc = 5:1, then 2:1) to afford alcohol **7a** (2.5 mg, 90%) as a colorless oil: <sup>1</sup>H NMR (600 MHz, CDCl<sub>3</sub>) 5.86-5.96 (m, 1H), 5.30 (d,  $J = 17.4$  Hz, 1H), 5.22 (d,  $J = 10.2$  Hz, 1H), 5.13 (s, 1H), 5.09 (broad d,  $J = 6.0$  Hz, 1H), 4.98 (broad s, 1H), 4.78 (s, 1H), 4.74 (s, 1H), 4.54 (broad s, 2H), 4.08-4.18 (m, 3H), 3.98-4.06 (m, 1H), 3.76-3.82 (m, 2H), 3.63-3.70 (m, 1H), 3.58 (broad s, 1H), 3.07-3.14 (m, 1H) 2.81-2.92 (m, 2H), 2.50-2.58 (m, 1H), 2.32-2.41 (m, 1H), 2.24-2.28 (m, 1H), 1.52-2.19 (m, 34H), 1.39-1.48 (m, 11H), 0.94 (t,  $J = 7.8$  Hz, 9H), 0.92 (s, 9H), 0.87 (broad d,  $J = 6.6$  Hz, 3H), 0.82 (broad d,  $J = 6.6$  Hz, 3H), 0.76 (broad d,  $J = 4.8$  Hz, 3H), 0.56 (q,  $J = 7.8$  Hz, 6H), 0.10 (s, 3H), 0.06 (s, 3H) ppm; LRMS (ESI) calcd for C<sub>63</sub>H<sub>108</sub>N<sub>2</sub>O<sub>13</sub>Si<sub>2</sub> [M+NH<sub>4</sub>]<sup>+</sup> 1174.8, found 1174.4; [ $\alpha$ ]<sub>D</sub><sup>20</sup> +4.8 (c 0.14, PhH).

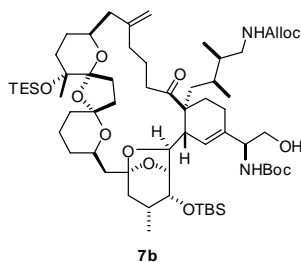

Alcohol **7b** was prepared according to the above procedure from azide **6b**: <sup>1</sup>H NMR (500 MHz, C<sub>6</sub>D<sub>6</sub>) 5.71-5.79 (m, 1H), 5.23-5.29 (m, 3H), 5.13 (dd,  $J = 17.0, 1.5$  Hz,



1H), 4.98 (d,  $J = 10.0$  Hz, 1H), 4.96 (s, 1H), 4.89 (s, 1H), 4.45-4.52 (m, 3H), 4.33 (d,  $J = 3.0$  Hz, 1H), 4.25 (m, 2H), 4.02 (dd,  $J = 11.5, 4.0$  Hz, 1H), 3.81-3.85 (m, 2H), 3.55-3.60 (m, 2H), 3.46-3.49 (m, 1H), 2.98-3.02 (m, 1H), 2.91 (d,  $J = 10.5$  Hz, 1H), 2.67-2.72 (m, 2H), 2.51-2.60 (m, 3H), 2.37-2.47 (m, 3H), 2.32 (dd,  $J = 12.0, 11.5$  Hz, 2H), 1.29-2.22 (m, 37 H), 1.06 (d,  $J = 6.5$  Hz, 3H), 1.04 (s, 9H), 1.02 (d,  $J = 8.5$  Hz, 9H), 0.86 (d,  $J = 6.0$  Hz, 3H), 0.74 (d,  $J = 6.5$  Hz, 3H), 0.61 (d,  $J = 8.0$  Hz, 6H), 0.29 (s, 3H), 0.21 (s, 3H) ppm.

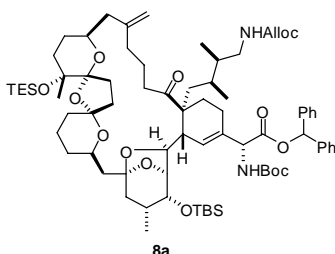

**Ester 8a.** To a stirred solution of alcohol **7a** (2.5 mg, 2.159  $\mu$ mol) and  $\text{NaHCO}_3$  (15 mg) in  $\text{CH}_2\text{Cl}_2$  (0.4 mL) was added Dess-Martin periodinane (3.0 mg) and stirred at rt for 15 min. After addition of additional Dess-Martin reagent (3.0 mg and 7.0 mg) every 30 min, the reaction mixture was quenched by addition of sat. aq.  $\text{NaHCO}_3$  and sat. aq.  $\text{Na}_2\text{S}_2\text{O}_3$ . The mixture was stirring at rt for 30 min, extracted with  $\text{Et}_2\text{O}$  (x 3), dried over anhydrous  $\text{Na}_2\text{SO}_4$ , and evaporated in vacuo to obtain the corresponding crude aldehyde.

To a solution of the above crude aldehyde in  $t$ -BuOH (0.25 mL) were added a solution of 2-methyl-2-butene in THF (2 M solution, 25  $\mu$ L) and a solution of the  $\text{NaClO}_2$  and  $\text{NaH}_2\text{PO}_4$  (250  $\mu$ L, made by dissolving  $\text{NaClO}_2$  (50 mg) and  $\text{NaH}_2\text{PO}_4$  (150 mg) in  $\text{H}_2\text{O}$  (20 mL)). After stirring at rt for 15 min, the mixture was diluted with  $\text{H}_2\text{O}$ , extracted with  $\text{Et}_2\text{O}$  (x 5), dried over anhydrous  $\text{Na}_2\text{SO}_4$ , filtered, and concentrated to afford the corresponding crude carboxylic acid.

To a solution of the above crude carboxylic acid in  $\text{CH}_2\text{Cl}_2$  (1.0 mL) and added the diphenylmethyl diazomethane (10.0 mg). The mixture was stirred at rt for 20 min, evaporated. The residue was purified by  $\text{SiO}_2$  column chromatography (hexanes /  $\text{EtOAc} = 10:1, 6:1, \text{ then } 5:1$ ) to afford ester **8a** (3.2 mg, 100%):  $^1\text{H}$  NMR (600 MHz,  $\text{C}_6\text{D}_6$ ) 7.01-7.32 (m, 11H), 5.87 (broad, 1H), 5.79 (broad d,  $J = 7.2$  Hz, 1H), 5.42 (s, 1H), 5.23 (d,  $J = 17.4$  Hz, 1H), 5.18 (d,  $J = 7.2$  Hz, 1H), 5.06 (d,  $J = 10.2$  Hz, 1H), 4.99 (s, 1H), 4.91 (s,

1H), 4.57-4.68 (m, 2H), 4.45-4.52 (m, 1H), 4.40 (broad, 1H), 4.22-4.39 (m, 1H), 4.07 (broad s, 1H), 3.86-3.92 (m, 1H), 3.72 (broad s, 1H), 2.82-2.88 (m, 2H), 2.74-2.84 (m, 1H), 2.66-2.72 (m, 1H), 2.56-2.64 (m, 1H), 1.22-2.42 (m, 50H), 1.03 (t,  $J = 7.2$  Hz, 9H), 1.01 (s, 9H), 0.88-0.93 (m, 6H), 0.74 (broad d,  $J = 6.0$  Hz, 3H), 0.61 (q,  $J = 7.2$  Hz, 6H), 0.17 (s, 3H), 0.08 (s, 3H) ppm; LRMS (ESI) calcd for  $C_{76}H_{116}N_2O_{14}Si_2$   $[M+H]^+$  1337.9, found 1337.8;  $[\alpha]_D^{20}$  -14.9 ( $c$  0.07, PhH).

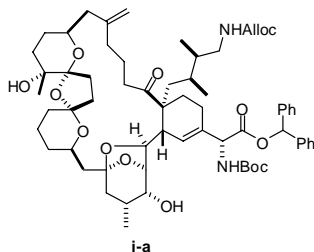

**Diol i-a.** To a stirred solution of bis-silyl ether **8a** (1.0 mg, 0.75  $\mu$ mol) in  $CH_3CN$  (0.4 mL) and  $Et_2O$  (2 drops) at rt was added 30% HF·Py in pyridine (4 drops) and neat HF·Py (4 drops). After 12 h of stirring at rt, neat HF·Py (2 drops) was added and stirring was continued for another 24h. The reaction mixture was filtered through a plug of  $SiO_2$ , eluted by EtOAc, and concentrated. The residue was purified by  $SiO_2$  column chromatography (hexanes / EtOAc = 3:1, 1:1 then 0:100) to afford diol **i-a** (0.9 mg, 100%) as a colorless oil:  $^1H$  NMR (500 MHz,  $C_6D_6$ ) 6.99-7.31 (m, 11H), 5.81-5.91 (m, 1H), 5.75 (broad d,  $J = 7.5$  Hz, 1H), 5.36 (s, 1H), 5.21 (broad d,  $J = 16.5$  Hz, 1H), 5.12 (broad d,  $J = 7.5$  Hz, 1H), 5.03 (broad d,  $J = 9.5$  Hz, 1H), 4.94 (s, 1H), 4.87 (s, 1H), 4.46-4.68 (m, 3H), 4.25-4.36 (m, 2H), 4.02 (s, 1H), 3.84 (broad d,  $J = 9.0$  Hz, 1H), 3.70 (broad, 1H), 3.51-3.58 (m, 1H), 2.91 (broad d,  $J = 7.0$  Hz, 2H), 2.74-2.85 (m, 1H), 2.60 (dd,  $J = 3.5, 13.0$  Hz, 1H), 2.35-2.44 (m, 1H), 1.16-2.21 (m, 44H), 0.91 (d,  $J = 6.0$  Hz, 3H), 0.84 (d,  $J = 7.0$  Hz, 3H), 0.74 (d,  $J = 6.5$  Hz, 3H) ppm; LRMS (ESI) calcd for  $C_{64}H_{88}N_2O_{14}$   $[M+H]^+$  1109.6, found 1109.4;  $[\alpha]_D^{20}$  -21.4 ( $c$  0.14, PhH).

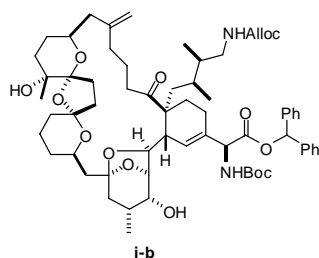

Diol **i-b** was prepared according to the above procedure from alcohol **7a**:  $^1\text{H}$  NMR (500 MHz,  $\text{C}_6\text{D}_6$ ) 6.98-7.32 (m, 11H), 5.83-5.90 (m, 1H), 5.58 (broad d,  $J = 7.0$  Hz, 1H), 5.30 (s, 1H), 5.20 (d,  $J = 16.5$  Hz, 1H), 5.02 (d,  $J = 11.0$  Hz, 1H), 4.92-4.94 (m, 1H), 4.92 (s, 1H), 4.86 (s, 1H), 4.64 (d,  $J = 5.5$  Hz, 2H), 4.24-4.36 (m, 2H), 4.16 (broad, 1H), 3.80 (dd,  $J = 11.5, 4.0$  Hz, 1H), 3.40 (broad d,  $J = 10.0$  Hz, 3H), 3.04-3.12 (m, 1H), 2.71-2.79 (m, 2H), 2.60 (dd,  $J = 12.5, 4.0$  Hz, 1H), 2.23-2.35 (m, 4H), 1.20-2.34 (m, 45H), 0.91 (d,  $J = 7.5$  Hz, 3H), 0.79 (d,  $J = 7.0$  Hz, 3H), 0.63 (d,  $J = 6.5$  Hz, 3H) ppm.

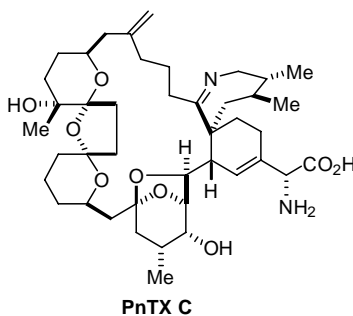

**PnTX C**: To a stirred solution of Alloc carbamate **i-a** (0.9 mg, 0.85  $\mu\text{mol}$ ) in toluene/AcOH (100:1, v/v, 0.2 mL) at rt was added  $\text{Pd}(\text{PPh}_3)_4$  (0.2 mg). After stirring for 20 min, the mixture was charged directly to a  $\text{SiO}_2$  column (EtOAc, EtOAc / MeOH = 10:1,  $\text{CHCl}_3$  / MeOH = 10:1, then  $\text{CHCl}_3$  / MeOH /  $\text{H}_2\text{O}$  = 16:8:1) to afford the corresponding amine (0.6 mg, 72%) as a colorless oil:  $^1\text{H}$  NMR (500 MHz,  $\text{CD}_3\text{OD}$ ) 7.28-7.37 (m, 10H), 6.97 (s, 1H), 5.22 (s, 1H), 4.83 (s, 1H), 4.80 (s, 1H), 4.69 (s, 1H), 4.21-4.28 (m, 1H), 4.04-4.11 (m, 1H), 3.90 (s, 1H), 3.58-3.66 (m, 1H), 3.53 (s, 1H), 2.93 (broad d,  $J = 10.5$  Hz, 1H), 2.90 (dd,  $J = 5.5, 10.5$  Hz, 2H), 2.70 (dd,  $J = 9.0, 13.0$  Hz, 1H), 2.59-2.67 (m, 1H), 2.29-2.38 (m, 2H), 1.15-2.22 (m, 46H), 0.91 (d,  $J = 7.0$  Hz, 6H), 0.82 (d,  $J = 7.0$  Hz, 3H) ppm; HRMS (ESI) calcd for  $\text{C}_{60}\text{H}_{84}\text{N}_2\text{O}_{12}$   $[\text{M}+\text{H}]^+$  1025.6102, found 1025.6097;  $[\alpha]_{\text{D}}^{20}$  -19.3 ( $c$  0.14, PhH).

This reaction was divided two batches. The above ketoamine (0.85 mg x 2, 1.7  $\mu\text{mol}$ ) was dissolved in 1% w/v 1,3,5-triisopropylbenzoic acid - triethylamine salt in xylene (0.8 mL x 2, prepared by dissolving 100 mg of 1,3,5-triisopropylbenzoic acid in 10 mL of xylene, followed by addition of 1 eq. of  $\text{NEt}_3$  relative to the acid) and stirred at  $80^\circ\text{C}$  for 36 h. The reaction mixture was charged directly to a  $\text{SiO}_2$  column (hexanes / EtOAc = 5:1, 2:1, 1:1, then 0:100) to afford a mixture of the cyclized imine and 1,3,5-triisopropylbenzoic acid as an inseparable mixture (1.4 mg): HRMS (ESI) calcd for  $\text{C}_{60}\text{H}_{82}\text{N}_2\text{O}_{11}$   $[\text{M}+\text{H}]^+$  1007.5997, found 1007.5997.

This reaction was divided two batches. The above imine (0.7 mg x 2) was dissolved in TFA /  $\text{CH}_2\text{Cl}_2$  (1:1, v/v, 1.0 mL) and stirred at rt for 10 min. The reaction mixture was poured into toluene (10 mL x 2) and concentrated. The residue was purified by reversed phase HPLC (YMC-Pack ODS-A, 250 x 10 mm,  $\text{H}_2\text{O}$  /  $\text{CH}_3\text{CN}$  = 3:1, v/v, containing 0.1% TFA, detection at 216 nm) to afford PnTX C (1.1 mg, 89% in 2 steps): LRMS (ESI) calcd for  $\text{C}_{42}\text{H}_{64}\text{N}_2\text{O}_9$   $[\text{M}+\text{H}]^+$  741.5, found 741.5.

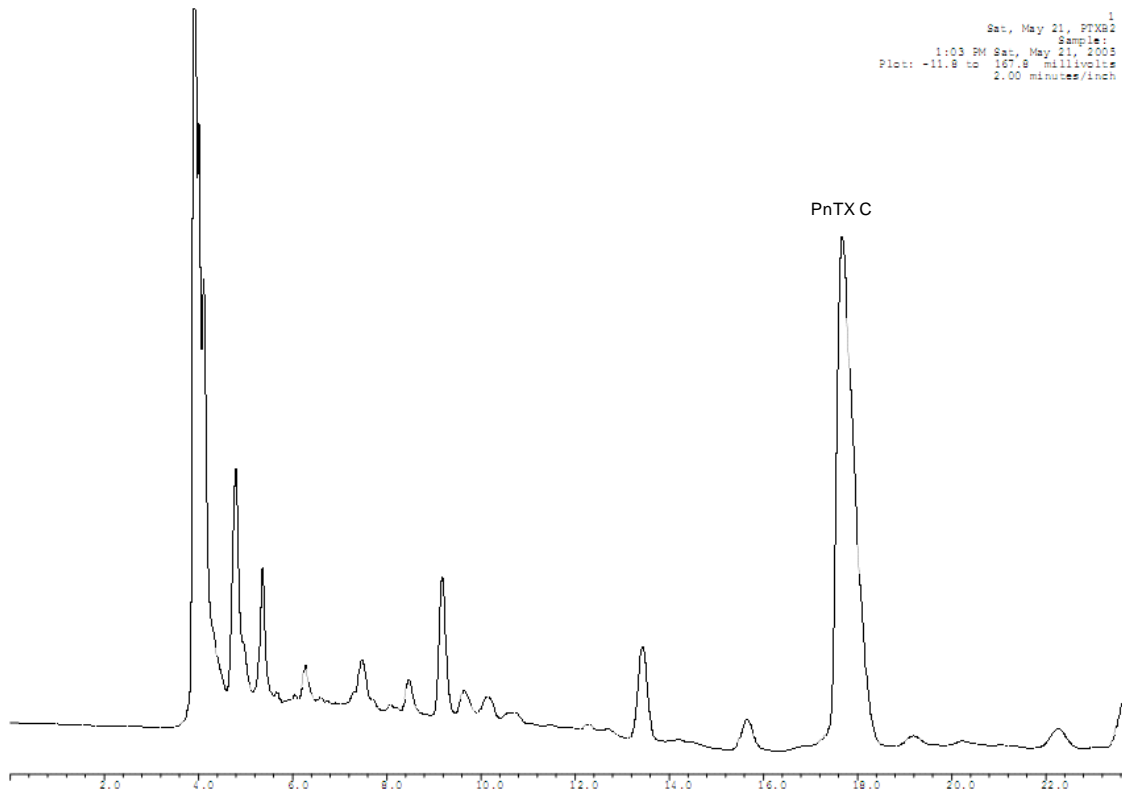

**Figure I.** HPLC Trace for Purification of PnTX C.

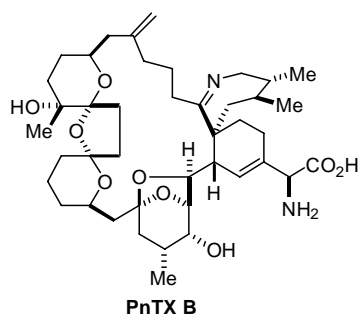

PnTX B was prepared according to the above procedure from ester **i-b**.

**Table 1.** PnTX B (reference CD<sub>3</sub>OD 3.306 ppm, 500 MHz, CD<sub>3</sub>OD)

| proton number                                                                                | $\delta$ (ppm)       | $J$ (Hz)  | natural PtTX B |
|----------------------------------------------------------------------------------------------|----------------------|-----------|----------------|
| 32                                                                                           | 5.546 (s, 1H)        |           | 5.46           |
| 39a                                                                                          | 4.942 (s, 1H)        |           | 4.94           |
| 39b                                                                                          | hidden (1H)          |           | 4.86           |
| 29                                                                                           | 4.590 (d, 1H)        | 3.2       | 4.61           |
| 34                                                                                           | 4.333 (s, 1H)        |           | 4.07           |
| 1b                                                                                           | 4.288 (broad d, 1H)  | 13.9      | 4.27           |
| 12                                                                                           | 4.087 (broad t, 1H)  | ?         | 4.10           |
| 23                                                                                           | 4.046 (m, 1H)        |           | 4.05           |
| 30                                                                                           | 3.892 (dd, 1H)       | 11.7, 4.7 | 3.91           |
| 28                                                                                           | 3.701 (d, 1H)        | 2.7       | 3.74           |
| 1a/7(CH <sub>2</sub> )/31                                                                    | 3.625-3.539 (m, 4H)  |           | 3.67/3.57/3.52 |
| 11b/36 (CH <sub>2</sub> )                                                                    | 2.471-2.365 (m, 3H)  |           | 2.39/2.43/2.36 |
| 9b/11a/17b/27                                                                                | 2.234-2.155 (m, 4H)  |           |                |
| 4b/4a/8b/8a/9a/14b/<br>18b/18a/20b/21b/<br>24b/24a/40b/40a/<br>2/13b/17a/21a/22b/<br>26b/26a | 2.089-1.609 (m, 21H) |           |                |
| 14a/20a                                                                                      | 1.554-1.511 (m, 2H)  |           | 1.53/1.53      |
| 3/13a/22a                                                                                    | 1.401-1.261 (m, 3H)  |           | 1.42/1.34/1.28 |
| 38 (methyl)                                                                                  | 1.231 (s, 3H)        |           | 1.24           |
| 42 (methyl)                                                                                  | 1.223 (d, 3H)        | hidden ?  | 1.23           |
| 41 (methyl)                                                                                  | 1.087 (d, 3H)        | 6.5       | 1.10           |
| 37 (methyl)                                                                                  | 1.034 (d, 3H)        | 6.6       | 1.05           |

**Table 2.** PnTX C (reference CD<sub>3</sub>OD 3.306 ppm, 500 MHz, CD<sub>3</sub>OD)

| proton number                                                                                | $\delta$ (ppm)       | $J$ (Hz)  | natural PtTX C |
|----------------------------------------------------------------------------------------------|----------------------|-----------|----------------|
| 32                                                                                           | 5.540 (s, 1H)        |           | 5.44           |
| 39a                                                                                          | 4.936 (s, 1H)        |           | 4.94           |
| 39b                                                                                          | hidden (1H)          |           | 4.86           |
| 29                                                                                           | 4.533 (d, 1H)        | 3.6       | 4.54           |
| 34                                                                                           | 4.403 (s, 1H)        |           | 4.11           |
| 1b                                                                                           | 4.270 (dd, 1H)       | 16.9, 4.3 | 4.27           |
| 12                                                                                           | 4.085 (broad t, 1H)  | ?         | 4.10           |
| 23                                                                                           | 4.042 (m, 1H)        |           | 4.05           |
| 30                                                                                           | 3.858 (dd, 1H)       | 11.7, 4.6 | 3.87           |
| 28                                                                                           | 3.793 (d, 1H)        | 2.5       | 3.86           |
| 1a/7(CH <sub>2</sub> )/31                                                                    | 3.638-3.553 (m, 4H)  |           | 3.67/3.57/3.59 |
| 11b/36 (CH <sub>2</sub> )                                                                    | 2.530-2.363 (m, 3H)  |           | 2.39/2.30/1.08 |
| 9b/11a/17b/27                                                                                | 2.216-2.170 (m, 4H)  |           |                |
| 4b/4a/8b/8a/9a/14b/<br>18b/18a/20b/21b/<br>24b/24a/40b/40a/<br>2/13b/17a/21a/22b/<br>26b/26a | 2.086-1.602 (m, 21H) |           |                |
| 14a/20a                                                                                      | 1.549-1.504 (m, 2H)  |           | 1.53/1.53      |
| 3/13a/22a                                                                                    | 1.439-1.257 (m, 3H)  |           | 1.38/1.34/1.28 |
| 38 (methyl)                                                                                  | 1.230 (s, 3H)        |           | 1.24           |
| 42 (methyl)                                                                                  | 1.226 (d, 3H)        | hidden ?  | 1.23           |
| 41 (methyl)                                                                                  | 1.084 (d, 3H)        | 6.6       | 1.09           |
| 37 (methyl)                                                                                  | 1.043 (d, 3H)        | 6.6       | 1.04           |

Synthetic PnTX B contaminated with  
ca. 5-10% PnTX C (see arrow)  
(500 MHz, CD<sub>3</sub>OD)

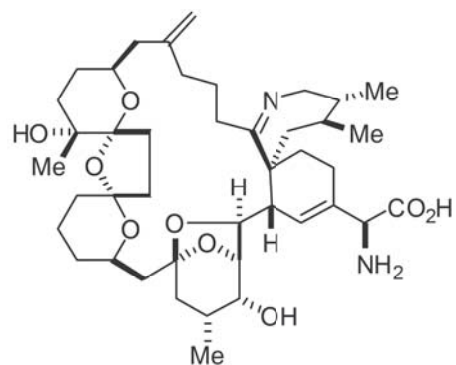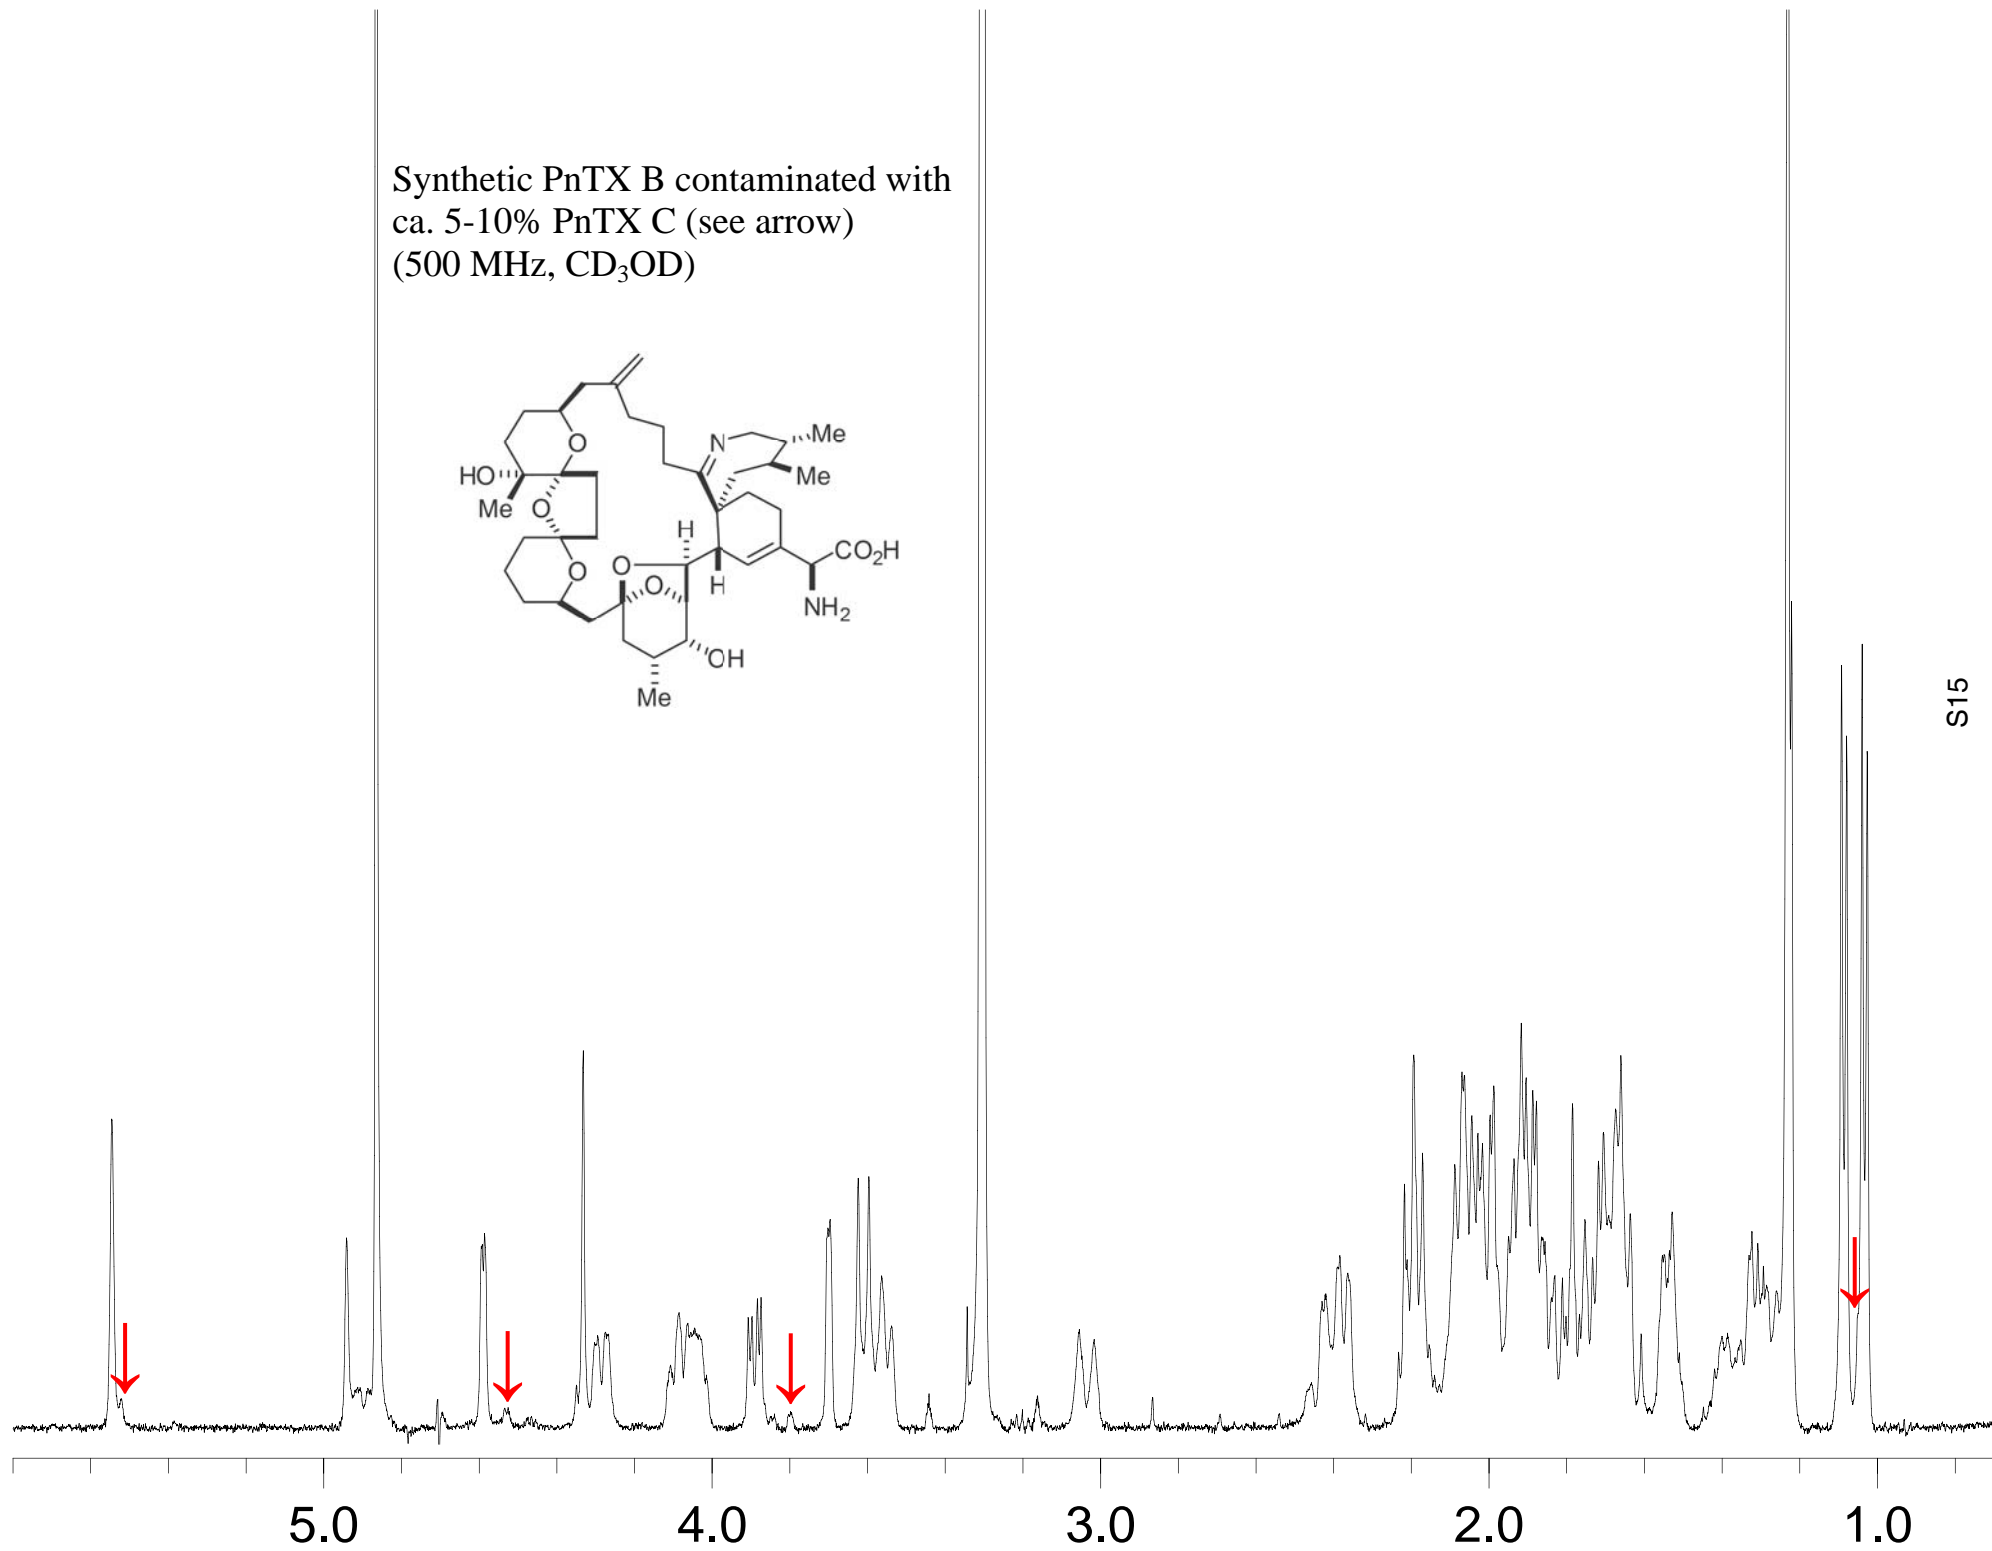



Synthetic PnTX C contaminated with  
ca. 5-10% PnTX B (see arrow)  
(500 MHz, CD<sub>3</sub>OD)

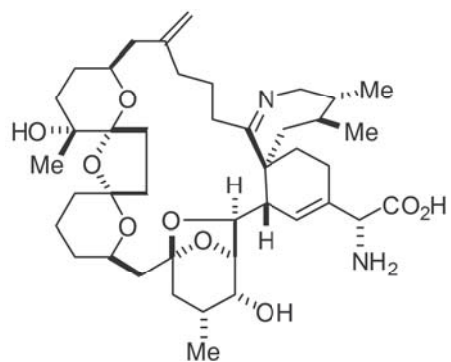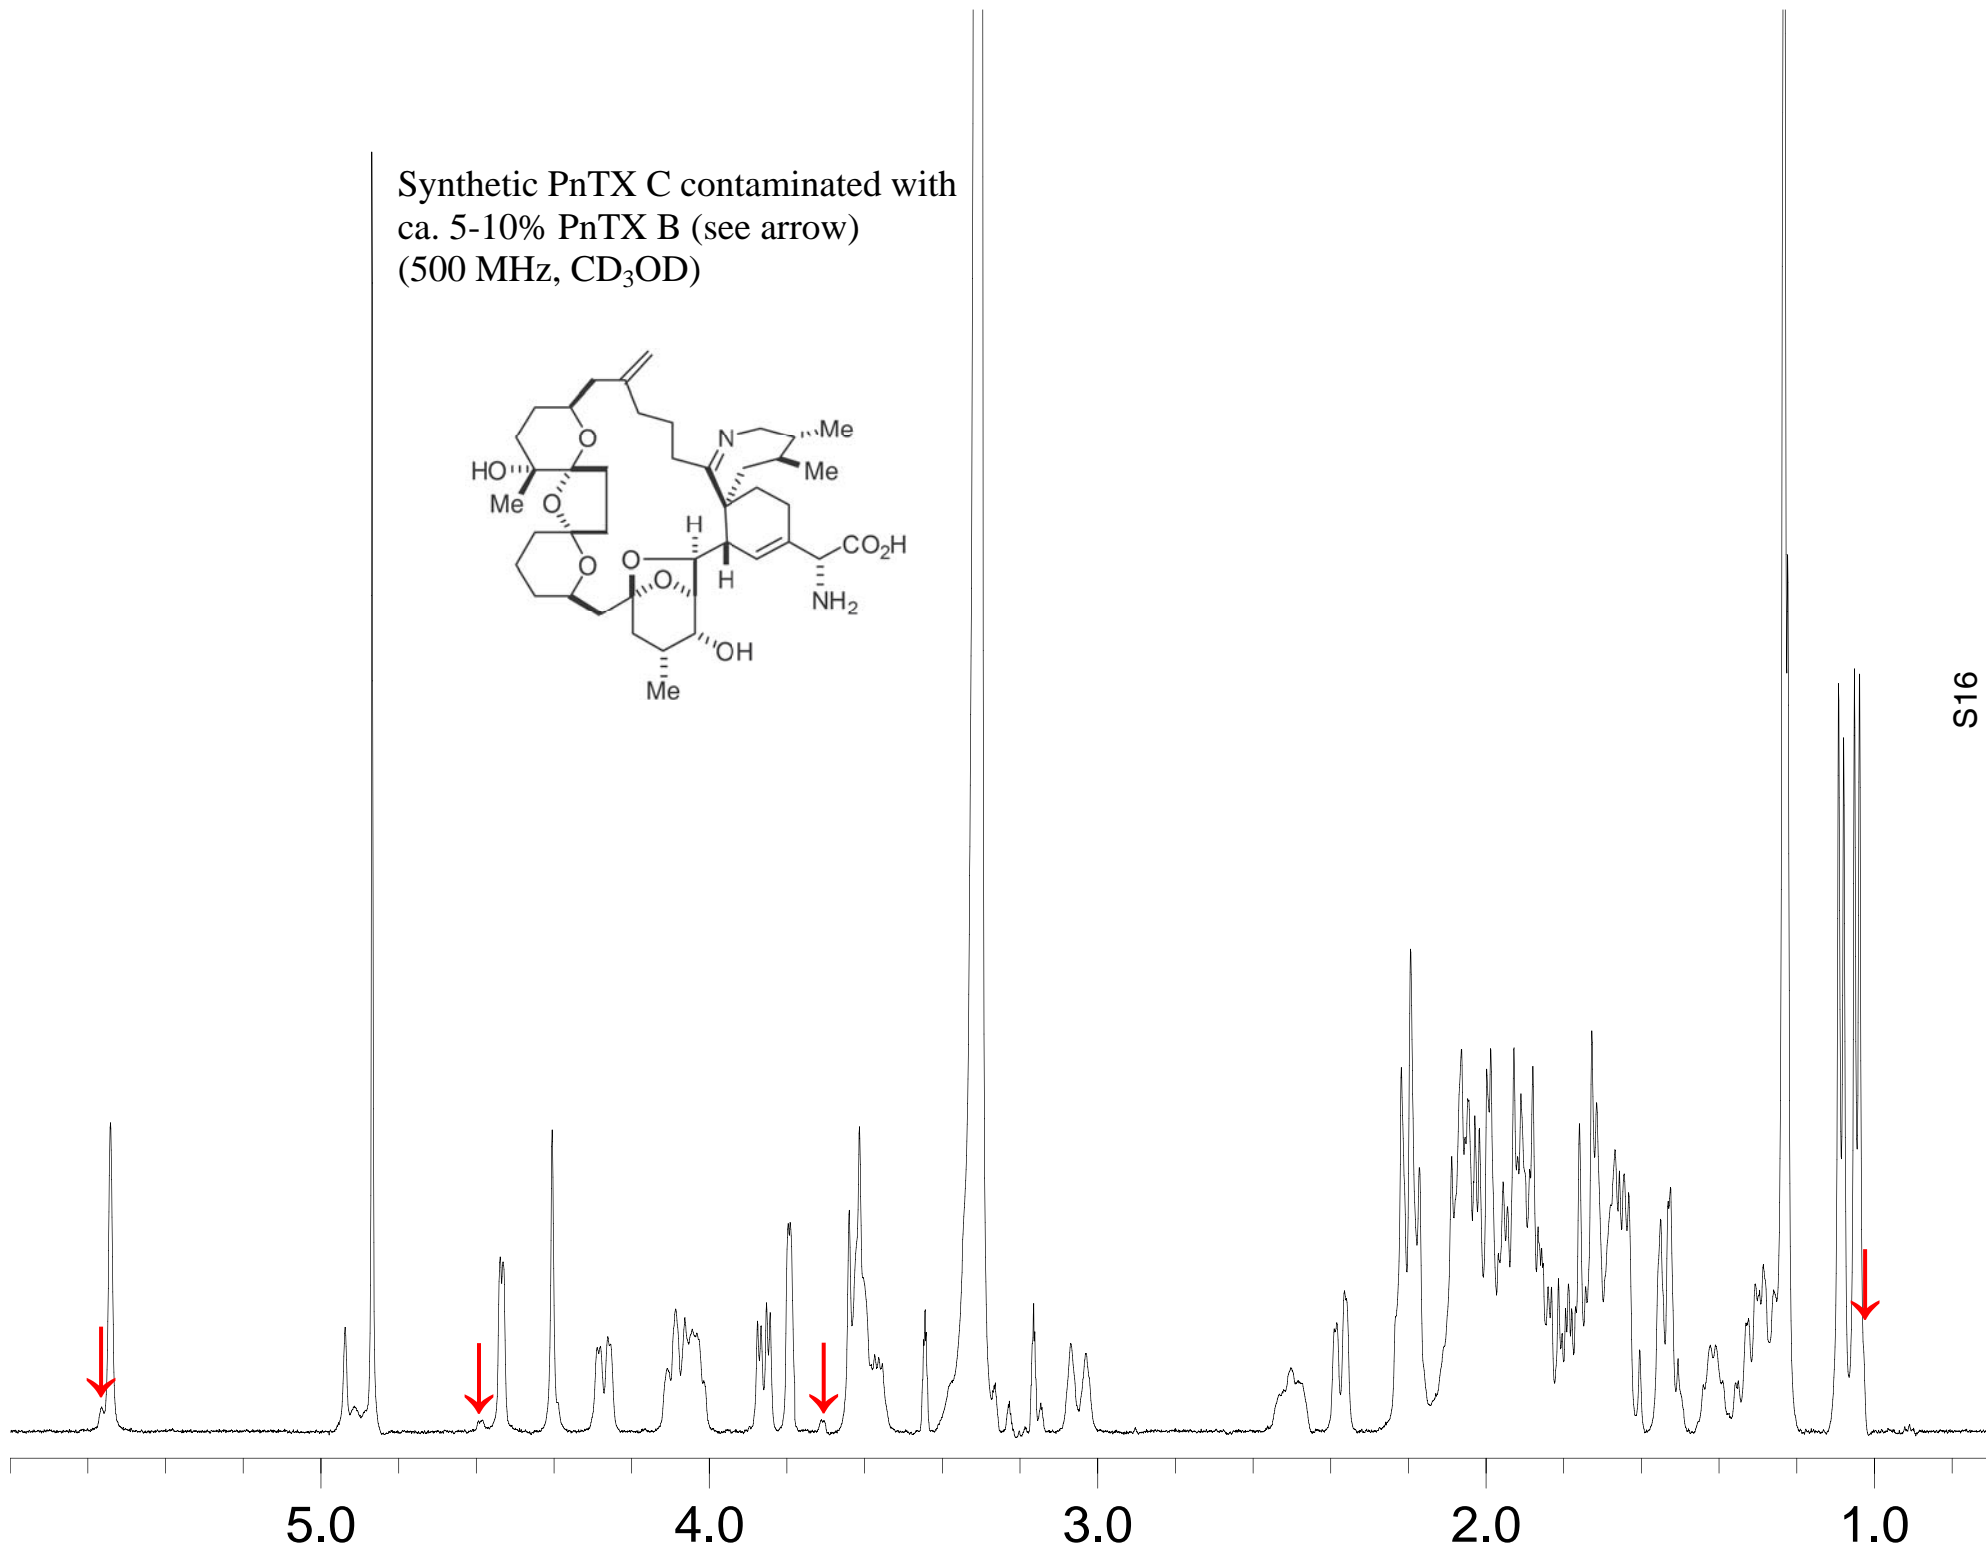

Synthetic PnTX C contaminated with  
ca. 5-10% PnTX B (see arrow)  
(500 MHz, CD<sub>3</sub>OD)

Synthetic PnTX B contaminated with  
ca. 5-10% PnTX C (see arrow)  
(500 MHz, CD<sub>3</sub>OD)

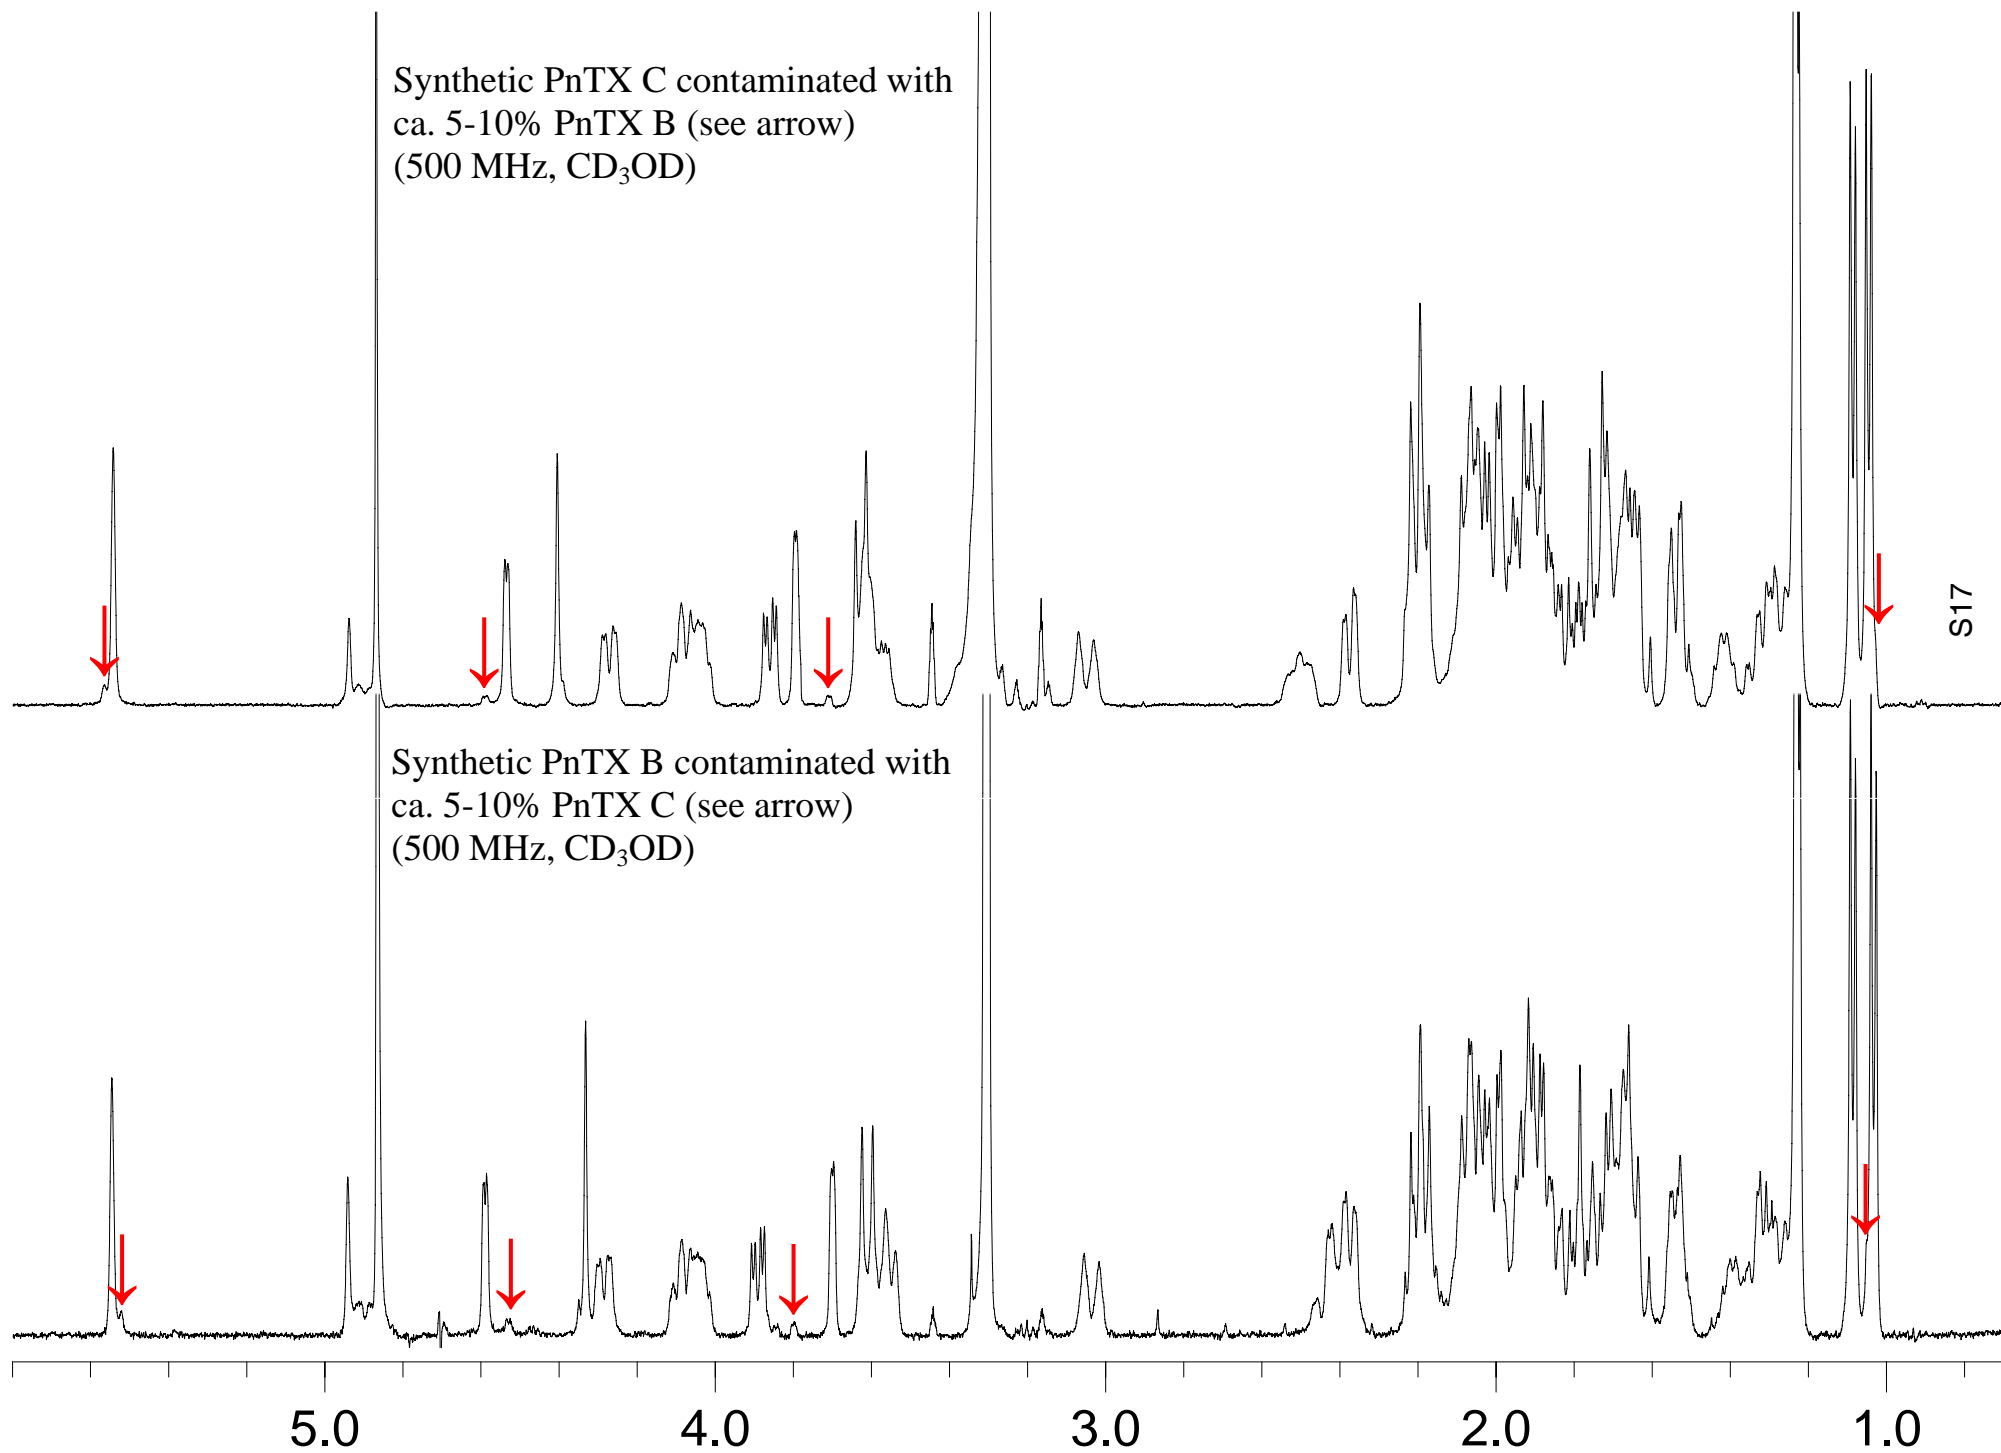

Overlaid Spectra of  
Synthetic PnTX B contaminated with ca. 5-10% PnTX C (Black)  
Synthetic PnTX C contaminated with ca. 5-10% PnTX B (Red)  
(500 MHz, CD<sub>3</sub>OD)

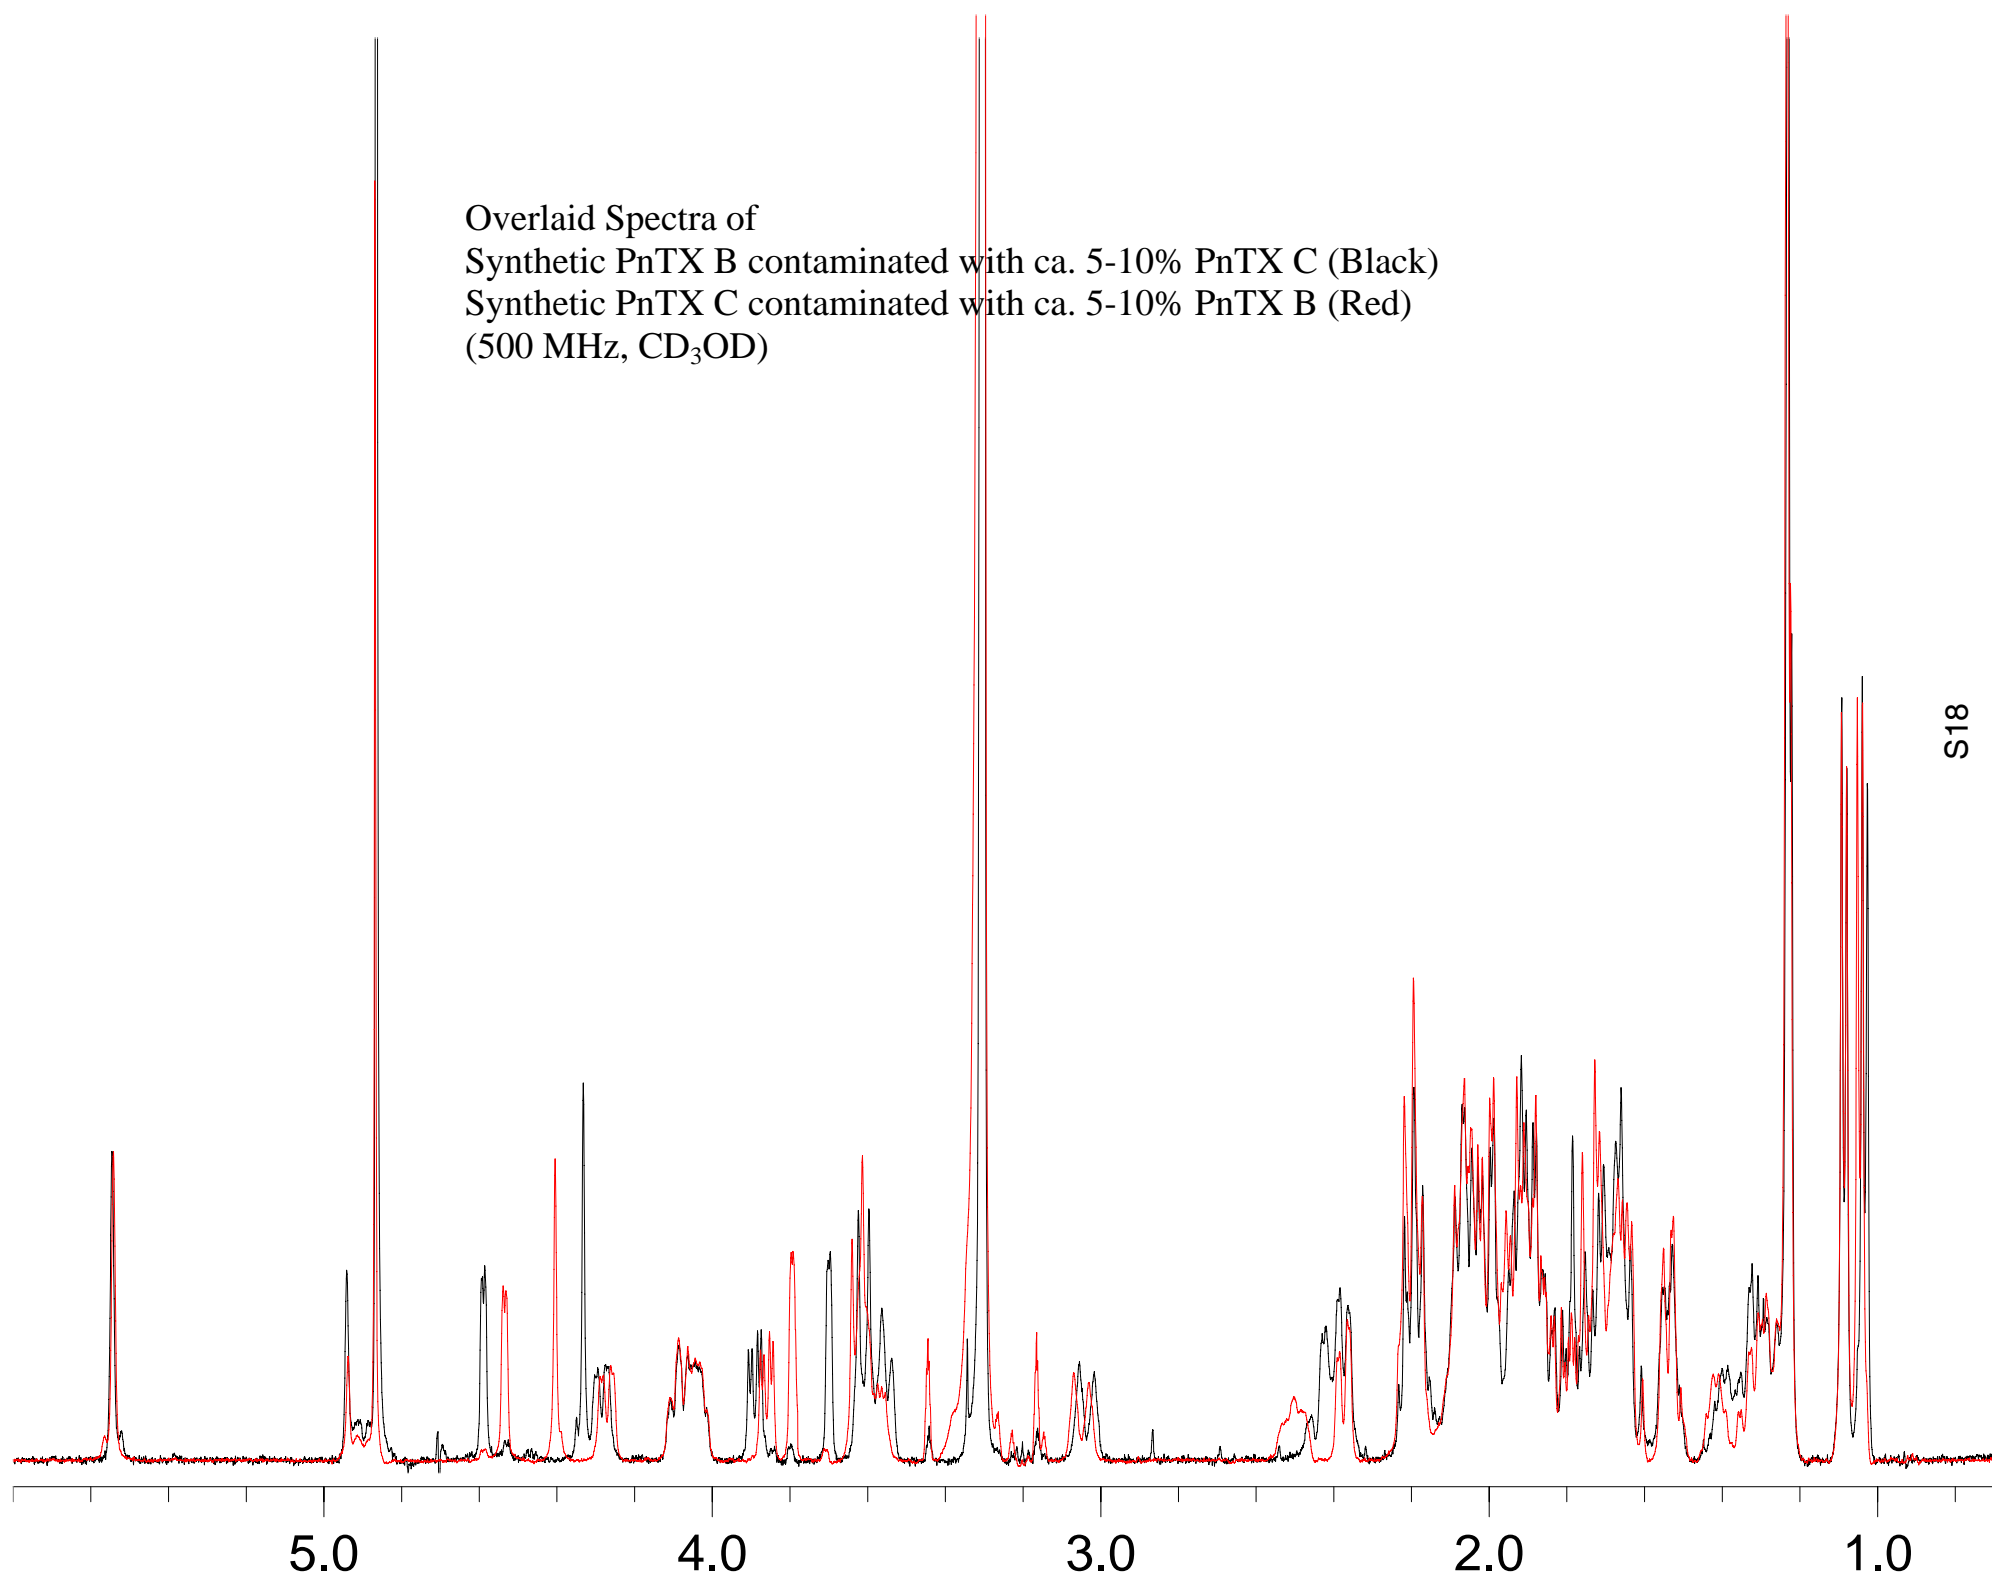

Synthetic PnTX C (contaminated with ca. 5-10% PnTX B)  
doped with a small amount of natural PnTX B/C (ca. 1:1 mixture)  
(500 MHz, CD<sub>3</sub>OD)

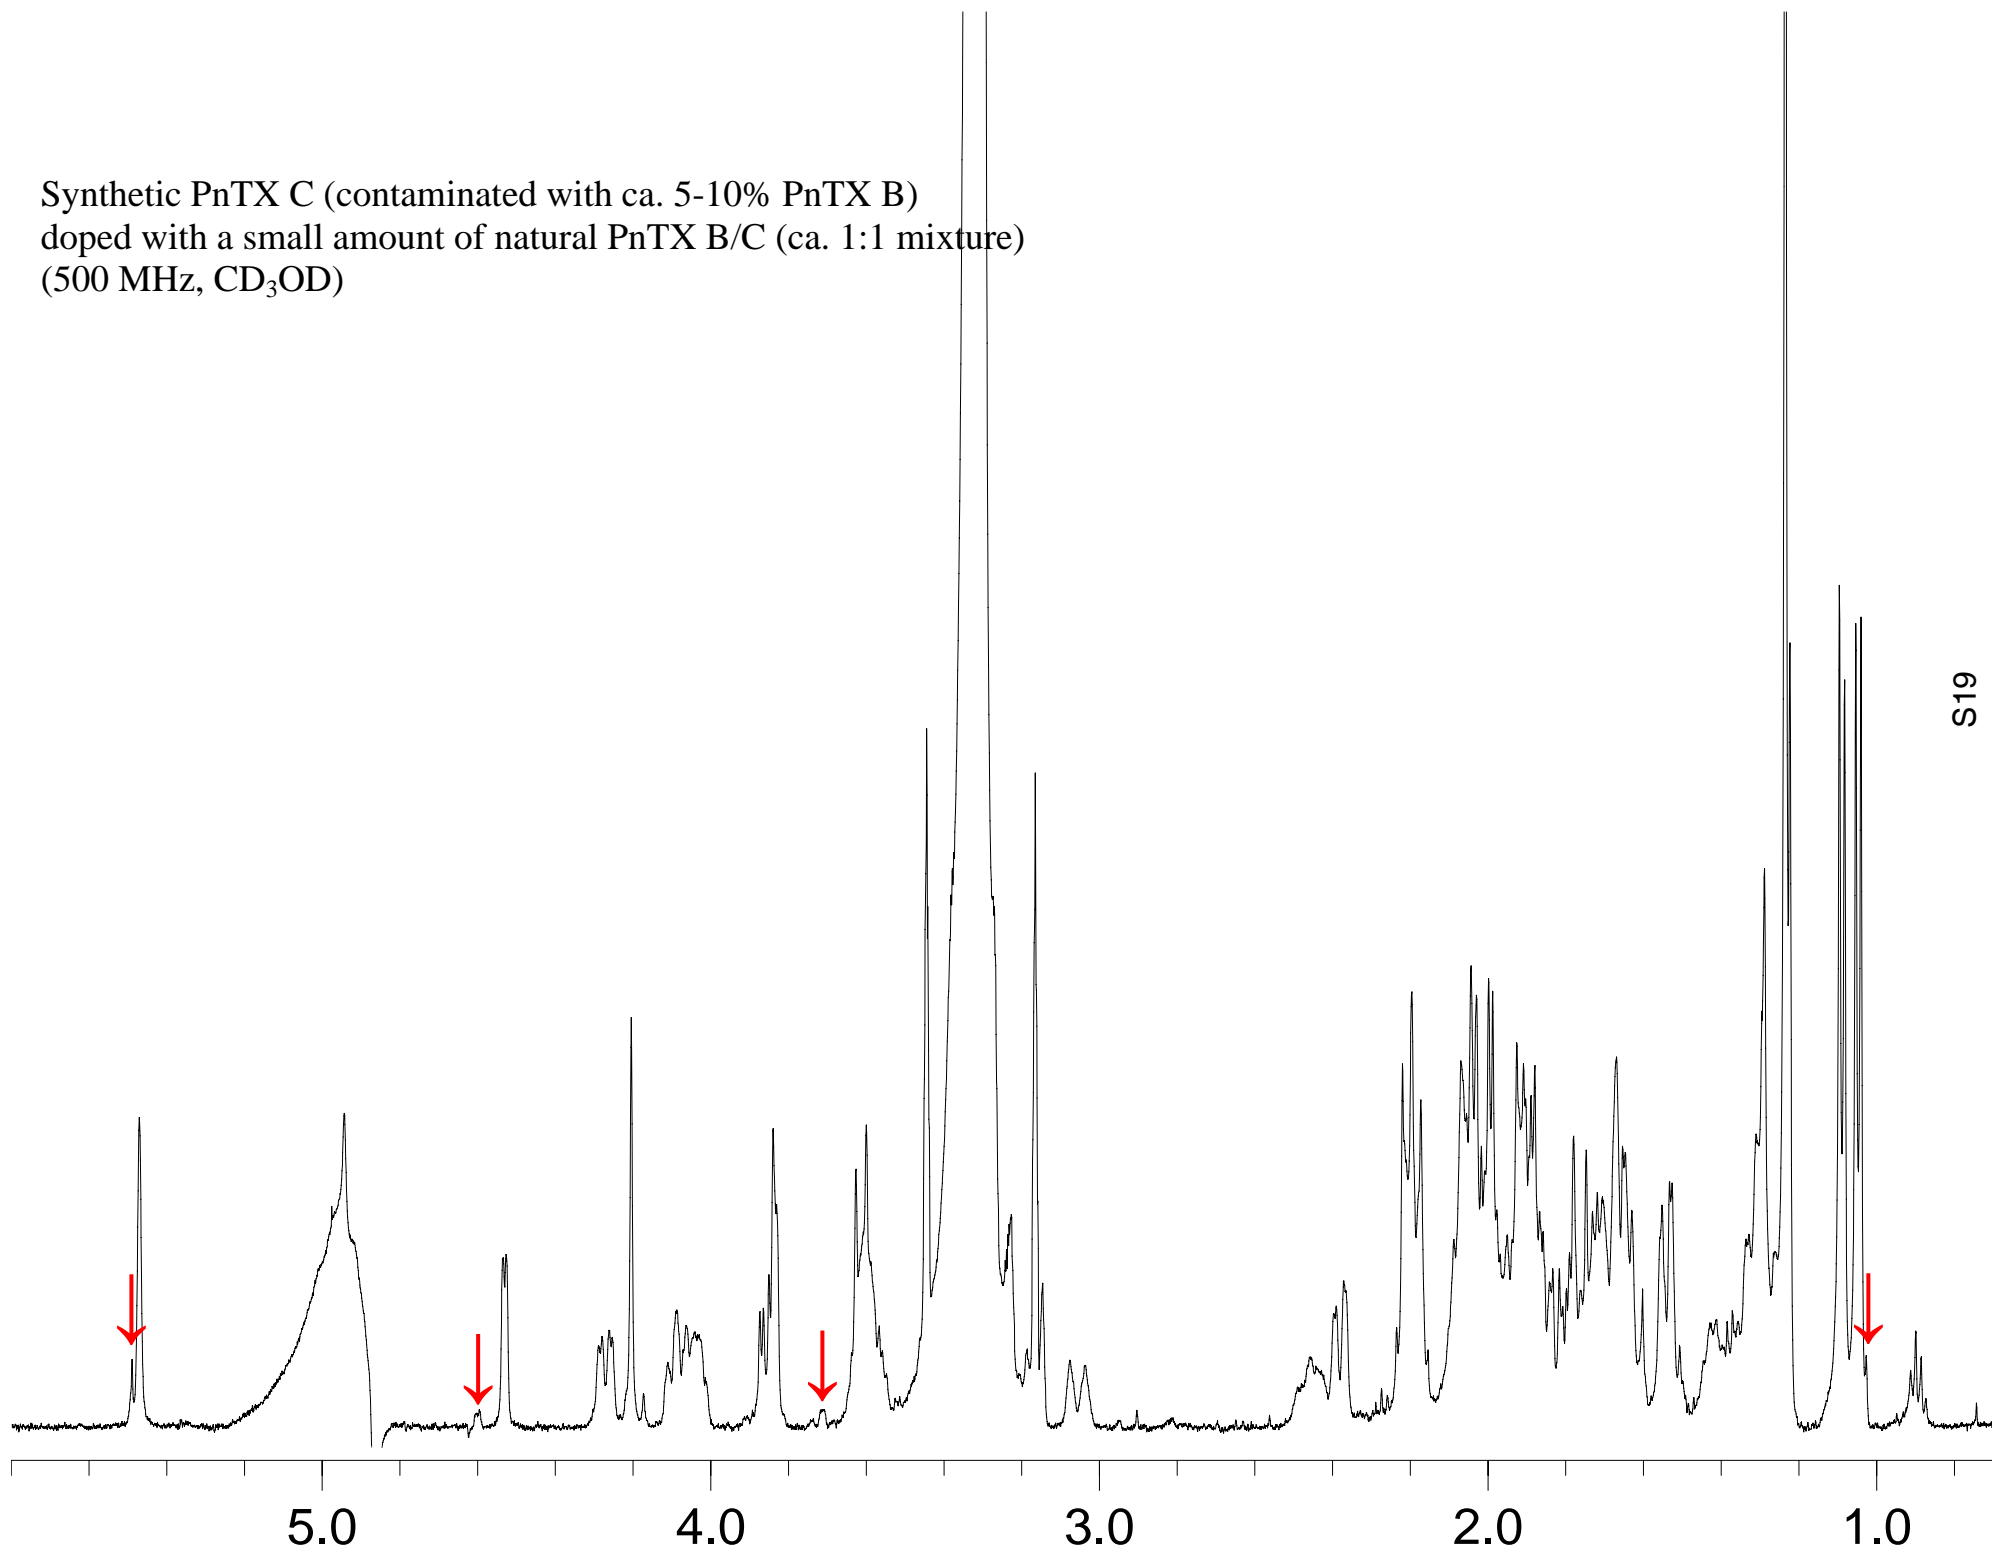

Concentration Effects on  
Synthetic PnTX B (contaminated with ca. 5-10% PnTX C)  
(500 MHz, CD<sub>3</sub>OD)  
concentration = 1 x (black)  
concentration = 1/2 x (blue)  
concentration = 1/4 x (red)

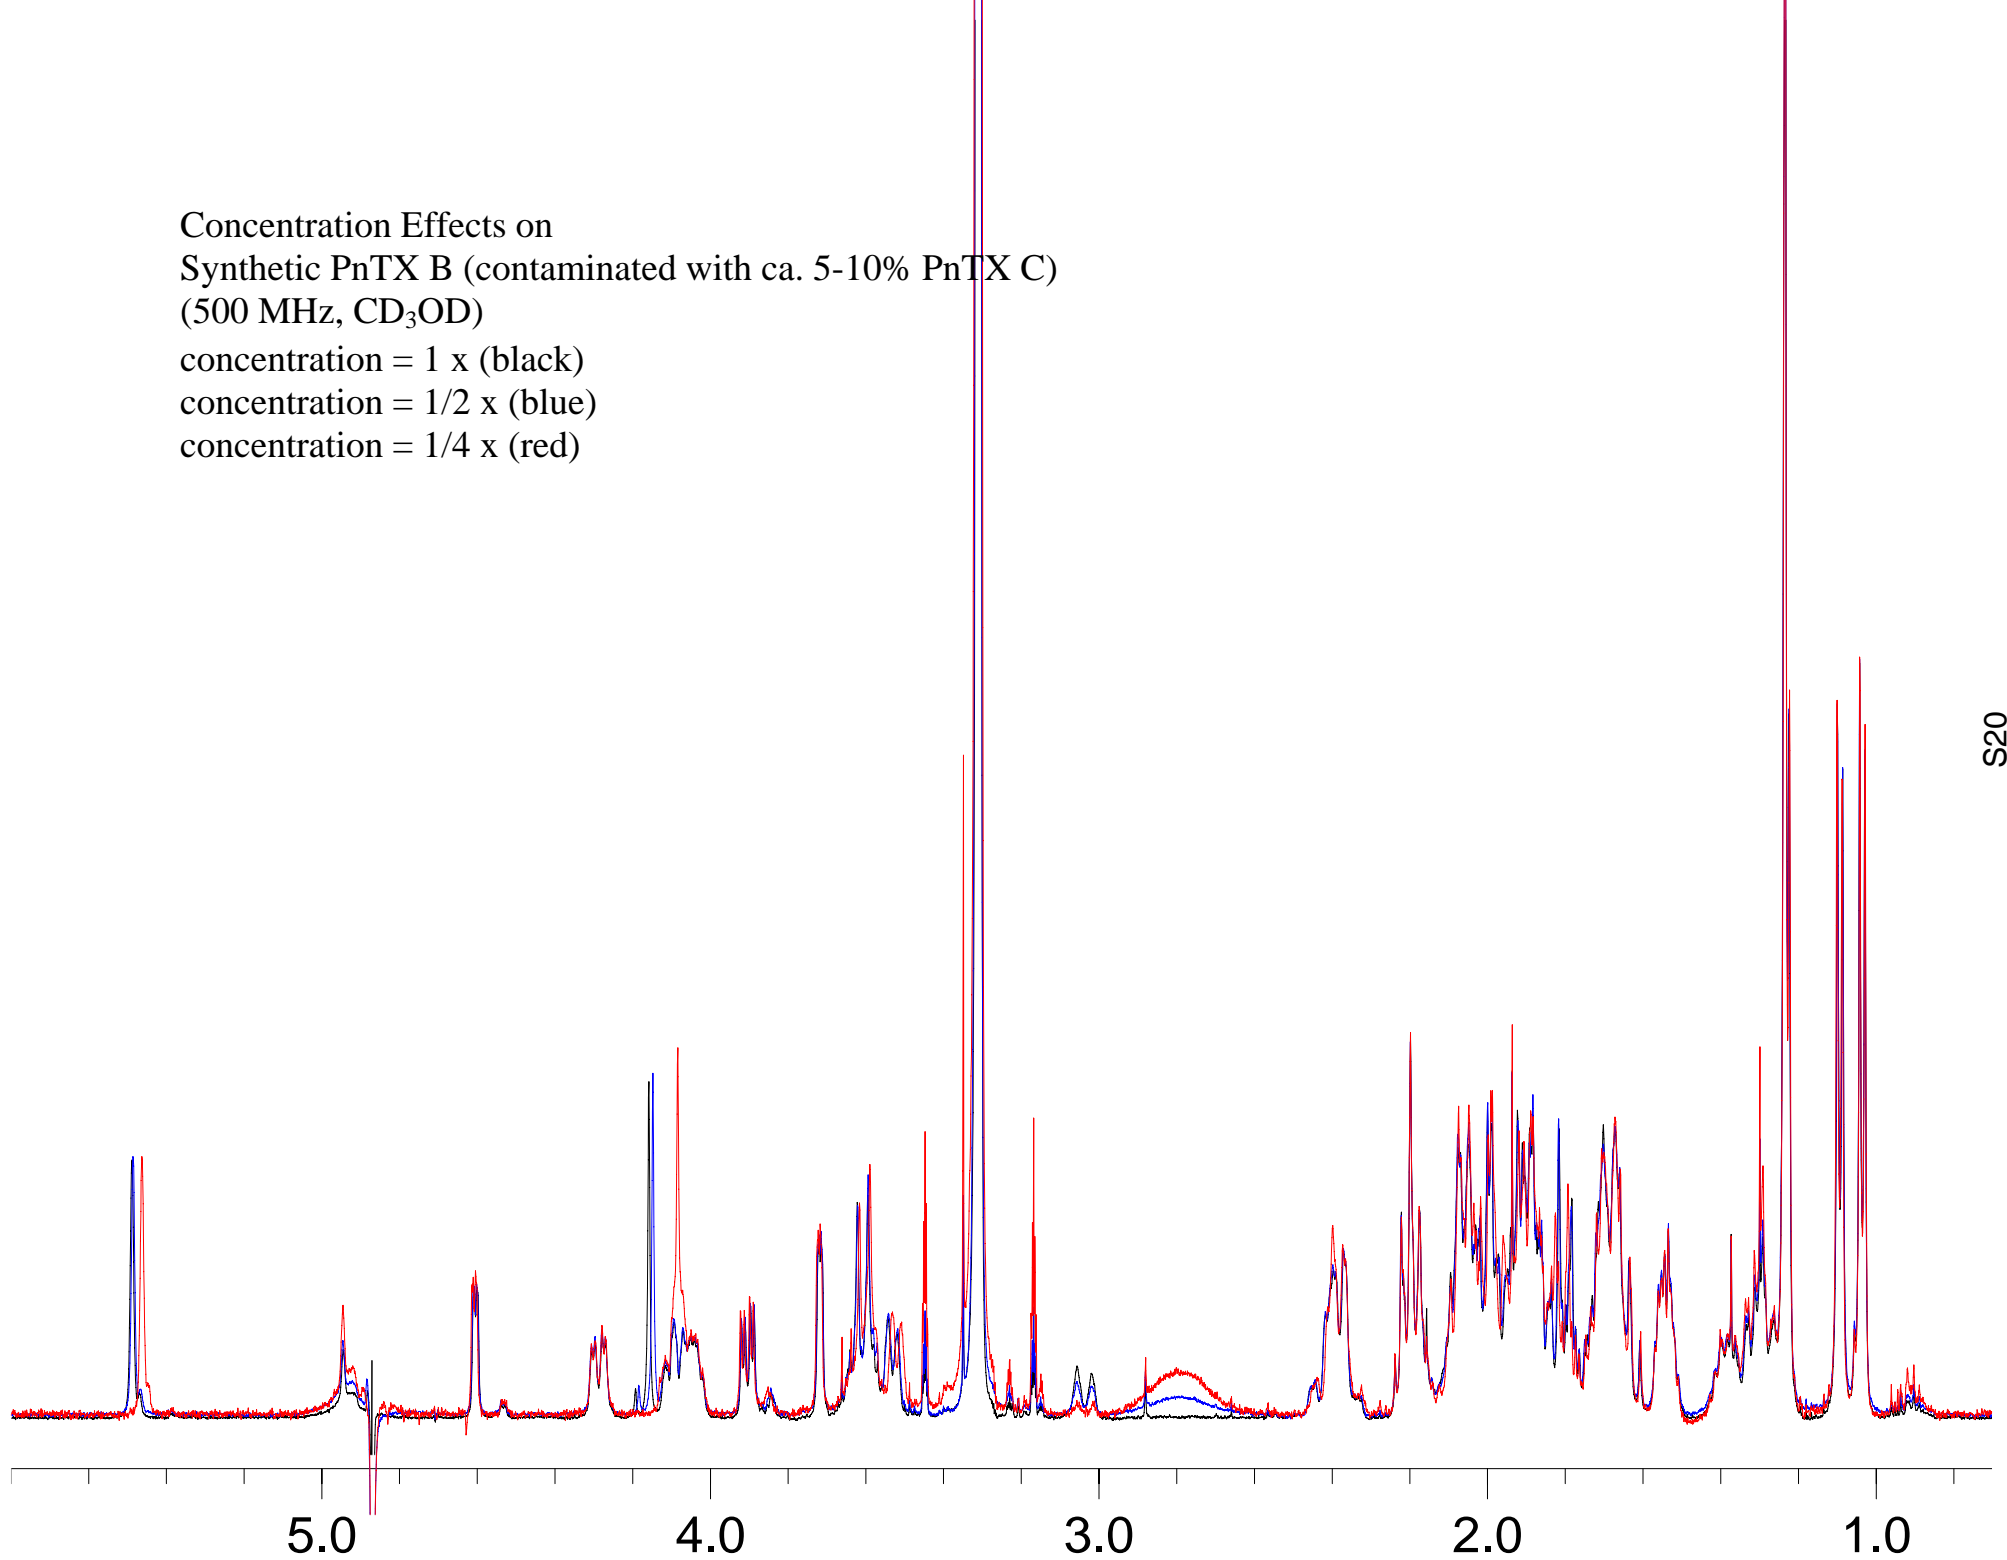

Supplement: NIHMS63807-supplement-1si20060511_09.pdf [file NIHMS63807-supplement-1si20060511_09.pdf]
